# Supplementary material for: Psychological and clinical characteristics of female patients with spontaneous coronary artery dissection
Source: Springer Nature journal article supplement (doi:10.1007/s12471-020-01437-7), 2020-06-04
Supplement: MOESM1 [file 18051406]

## SUPPLEMENTAL FILES

## Supplemental Table S1. Explorative group comparisons

Table S1a. Explorative group comparisons: FMD vs. no FMD

|                                                             | No FMD<br>(n=92) | FMD (n=38) | Fisher's exact test/Chi-square/Anova |
|-------------------------------------------------------------|------------------|------------|--------------------------------------|
| Irritable bowel syndrome                                    | 8 (9%)           | 9 (24%)    | FET, $p=0.041$                       |
| Tinnitus                                                    | 20 (22%)         | 19 (50%)   | $X^2(1) = 10.23, p=0.001$            |
| Chronic fatigue syndrome                                    | 1 (1%)           | 6 (16%)    | FET, $p=0.003$                       |
| Pain in jaws or neck                                        | 17 (18%)         | 15 (39%)   | $X^2(1) = 6.39, p=0.015$             |
| Moderate or severe depressive symptoms<br>(PHQ-9 $\geq$ 10) | 4 (4%)           | 6 (16%)    | FET, $p=0.034$                       |

Table S1b. Explorative group comparisons: Migraine vs. no migraine

|                                      | No migraine<br>(n=83) | Migraine<br>(n=89) | Fisher's exact test/Chi-square/Anova |
|--------------------------------------|-----------------------|--------------------|--------------------------------------|
| Hypertension                         | 18 (22%)              | 36 (40%)           | $X^2(1) = 7.02, p=0.008$             |
| Rheumatic disorder                   | 2 (2%)                | 13 (15%)           | $X^2(1) = 8.03, p=0.005$             |
| Tinnitus                             | 17 (20%)              | 31 (35%)           | $X^2(1) = 4.40, p=0.042$             |
| Hypo-or hyperthyroidism              | 5 (6%)                | 15 (17%)           | $X^2(1) = 4.90, p=0.027$             |
| Chronic pain                         | 15 (18%)              | 35 (39%)           | $X^2(1) = 9.41, p=0.002$             |
| Other (hormonal) disorder            | 2 (2%)                | 9 (10%)            | $X^2(1) = 4.26, p=0.039$             |
| No clinical history of comorbidities | 16 (19%)              | 0                  | $X^2(1) = 18.9, p<0.001$             |

|                                                         |               |               |                          |
|---------------------------------------------------------|---------------|---------------|--------------------------|
| Moderate or severe anxiety symptoms<br>(GAD7 $\geq$ 10) | 4 (5%)        | 17 (19%)      | $X^2(1) = 8.34, p=0.004$ |
| Substantial or extreme fatigue (FAS-10 $\geq$ 22)       | 38 (46%)      | 58 (65%)      | $X^2(1) = 6.54, p=0.011$ |
| Positive well-being (MHC-SF, mean $\pm$ SD)             | 3.4 $\pm$ 0.8 | 3.0 $\pm$ 0.9 | $F(1,169)=8.83, p=0.003$ |

Table S1c. Explorative group comparisons: Moderate or high stress vs. no stress

|                                                             | <b>No stress<br/>(PSS&lt;14)<br/>(n=86)</b> | <b>Moderate or<br/>high stress<br/>(PSS<math>\geq</math>14)<br/>(n=85)</b> | <b>Fisher's exact test/Chi-<br/>square/Anova</b> |
|-------------------------------------------------------------|---------------------------------------------|----------------------------------------------------------------------------|--------------------------------------------------|
| Pain between the shoulder blades                            | 29 (34%)                                    | 44 (52%)                                                                   | $X^2(1) = 5.69, p=0.017$                         |
| Pain in jaws or neck                                        | 15 (17%)                                    | 31 (36%)                                                                   | $X^2(1) = 7.87, p=0.005$                         |
| Chest pain                                                  | 49 (57%)                                    | 67 (79%)                                                                   | $X^2(1) = 9.35, p=0.002$                         |
| Moderate or severe anxiety symptoms<br>(GAD7 $\geq$ 10)     | 1 (1%)                                      | 20 (24%)                                                                   | $X^2(1) = 20.13, p<0.001$                        |
| Moderate or severe depressive symptoms<br>(PHQ-9 $\geq$ 10) | 0                                           | 16 (19%)                                                                   | $X^2(1) = 17.88, p<0.001$                        |
| Substantial or extreme fatigue<br>(FAS-10 $\geq$ 22)        | 26 (30%)                                    | 70 (82%)                                                                   | $X^2(1) = 47.16, p<0.001$                        |
| Type D personality (DS14 $\geq$ 10)                         | 4 (5%)                                      | 28 (33%)                                                                   | $X^2(1) = 22.49, p<0.001$                        |
| Neuroticism (BFI-NL neuroticism scale,<br>mean $\pm$ SD)    | 2.4 $\pm$ 0.6                               | 3.2 $\pm$ 0.6                                                              | $F(1,169)=87.36, p<0.001$                        |
| Positive well-being (MHC-SF, mean $\pm$ SD)                 | 3.5 $\pm$ 0.7                               | 2.9 $\pm$ 0.8                                                              | $F(1,168)=29.59, p<0.001$                        |

Table S2. Explorative group comparisons: Women vs. men

|                                  | <b>Women<br/>(n=172)</b> | <b>Men (n=11)</b> | <b>Fisher's exact test/Chi-square/Anova</b> |
|----------------------------------|--------------------------|-------------------|---------------------------------------------|
| Body Mass Index (BMI)            | 24.9±4.4                 | 28.4±10.3         | $F(1,180)=5.23, p=0.023$                    |
| Age at most recent SCAD event    | 49.4±7.6                 | 43.9±7.9          | $F(1,181)=5.27, p=0.023$                    |
| Working full time or part time   | 129 (75%)                | 11 (100%)         | FET, $p<0.001$                              |
| Migraine                         | 89 (52%)                 | 2 (18%)           | $X^2(1) = 4.66, p=0.031$                    |
| Pain between the shoulder blades | 73 (42%)                 | 1 (9%)            | FET, $p=0.029$                              |
| Chest pain                       | 117 (68%)                | 4 (36%)           | FET, $p=0.046$                              |
| Chronic pain                     | 50 (29%)                 | 0                 | FET, $p=0.037$                              |
